# Supplementary material for: Objective sequence-based subfamily classifications of mouse homeodomains reflect their in vitro DNA-binding preferences
Source: PubMed Central journal article supplement — Nucleic Acids Res. 2010 Aug 12;38(22):7927–42. doi: 10.1093/nar/gkq714 (PMC3001082; doi:10.1093/nar/gkq714), 2010-08-12

# Objective Sequence-Based Subfamily Classification of Mouse

## Homeodomains Reflects their *in vitro*

### DNA Binding Preferences

Miguel A. Santos<sup>1</sup>, Andrei L. Turinsky<sup>1</sup>, Serene Ong<sup>1</sup>, Jennifer Tsai<sup>1,3</sup>, Mike F. Berger<sup>4,5</sup>,  
Gwenael Badis<sup>8</sup>, Shaheynoor Talukder<sup>8</sup>, Andrew R. Gehrke<sup>4</sup>, Martha L. Bulyk<sup>4,6,9</sup>,  
Timothy R. Hughes<sup>7,8</sup> and Shoshana J. Wodak<sup>1,2,3#</sup>

<sup>1</sup> Molecular Structure and Function Program, Hospital for Sick Children, 555  
University Avenue, Toronto ON, Canada M5G 1X8

<sup>2</sup> Department of Biochemistry University of Toronto, 1 Kings College Circle, Toronto ON,  
Canada M5S 1A8

<sup>3</sup> Department of Molecular Genetics, University of Toronto, 1 Kings College Circle,  
Toronto ON, Canada M5S 1A8

<sup>4</sup> Division of Genetics, Department of Medicine, and <sup>5</sup> Department of Pathology, Brigham  
and Women's Hospital and Harvard Medical School, Boston, MA 02115.

<sup>6</sup> Committee on Higher Degrees in Biophysics, Harvard University, Cambridge, MA  
02138.

<sup>7</sup> Banting and Best Department of Medical Research, <sup>8</sup> Department of Medical Genetics  
and Microbiology, University of Toronto, Toronto, ON M4T 2J4

<sup>9</sup> Harvard/MIT Division of Health Sciences and Technology (HST), Harvard Medical  
School, Boston, MA 02115.

## Supplementary Figure S1

**Figure S1:** Multiple sequence alignment of the 381 homeodomains from different organisms added to mH178 to build the H559 dataset.

|                                 | 10                   | 20  | 30   | 40      | 50        | 60     | 70     | 80 | 90 |
|---------------------------------|----------------------|-----|------|---------|-----------|--------|--------|----|----|
| CCE07325_1::Cyprinus            | FTKEQIRELESEFAHH     | NYL | TRLR | RYEIAVN | LDLTERQVK | VWFQNR | RMKWK  | KR |    |
| SPE28572_1::Strongylocentrotus  | FTKEQIRELENEFNHH     | NYL | TRLR | RYEIAVT | LNLTERQVK | VWFQNR | RMKWK  | KR |    |
| ACF06894_1::Allium              | LTAEQVNMLEKSFEESE    | NKL | EPER | KGELAKK | LGLQPRQVA | VWFQNR | RRARWK |    |    |
| AMF13795_1::Ambystoma           | YSRYQTLLELEKEFLFN    | PYL | TRKR | RIEVSHA | LGLTERQVK | IWFQNR | RMKWK  | K  |    |
| AMF15085_1::Ambystoma           | YTGRQLAELEKEFRTN     | RYI | TSGR | KEELVAS | LGLTNRQVK | IWFQNR | RAKEKR |    |    |
| DIP01793_1::Brugia_malayi       | YTKYQTLLELEKEFLYN    | TYV | SKOK | RYELAKN | LYLSERQVK | IWFQNR | RMKDKK |    |    |
| SPE11478_1::Strongylocentrotus  | FSNDQTMLEKKEFENQ     | KYL | SPPE | RKKLAKV | LQLSERQVK | TWFQNR | RAKWR  |    |    |
| GHP09300_1 Vitis_vinifera       | LTSEQVYLLKESFEAE     | NKL | EPER | KSOLAKK | LGLQPRQVA | VWFQNR | RRARWK |    |    |
| LUP01625_1::Lotus_japonicus     | LTAEQVNLLEKSFEEAE    | NKL | EPER | KTELAKK | LGLQPRQVA | VWFQNR | RRARCK |    |    |
| RPP01355_1::Medicago_truncatula | LSVEQVHFLEKSFEE      | NKL | EPER | KTRLAKE | LGLQPRQVA | IWFQNR | RRARWK |    |    |
| SSD00939_1::Saccharum           | LTPEQVHLLERSFEE      | NKL | EPER | KTELARK | LGLQPRQVA | VWFQNR | RRARWK |    |    |
| BMD56378_1::Bombyx              | FTSEQLLELEREFHAK     | KYL | SLTE | RSQIAAA | LKLSEQVK  | IWFQNR | RAKWR  |    |    |
| BMD57173_1::Bombyx              | FTDHQLQTLKESFERQ     | KYL | SVQD | RMELAAK | LGLTDIQVK | TWYQNR | RTKWK  |    |    |
| CCE05499_1::Cyprinus            | YTKHRTLLELEKEFLFN    | MYL | TPER | RLEIXKS | INLTDQVK  | IWFQNR | RMKLLK |    |    |
| CSH13076_1::Ciona               | FTHEQVRQLELDFSEN     | HYL | TRLR | RYELSLK | LSLTERQIK | VWFQNR | RMKLLK |    |    |
| HRP00014_1::Halocynthia_oretzi  | FTPEQLELEREFLLKQ     | QYM | VGTE | RFXLAKE | LNLGEAQVK | VWFQNR | RRIKWR |    |    |
| SSF11272_1::Salmo               | YSRAQLLELEKEFLFN     | KYI | SRPR | RYELATT | LKLTERHIK | IWFQNR | RMKWK  |    |    |
| SSF44037_1::Salmo               | YSRAQLLELEKEFLFN     | KYI | SRPR | RYELATT | LNLTERHIK | IWFQNR | RMKWK  |    |    |
| AOP00376_1::Populus_trichocarpa | LSGEQVRLEKKNFEVE     | NKL | EPER | KARLAQE | LGLQPRQVA | VWFQNR | RRARWK |    |    |
| GRD05488_1::Gossypium           | LTVDQVQFLEKSFEEV     | NKL | EPER | KTQLAKE | LGLQPRQVA | IWFQNR | RRARWK |    |    |
| HAD32146_1::Helianthus          | LSTEQVRMLERSFEE      | NKL | EPER | KTELAKK | LGLQPRQVA | VWFQNR | RRARW  |    |    |
| JRP01502_1 Arabidopsis_thaliana | LTTEQVHLLKESFEAE     | NKL | EPDR | KTVLAKK | LGLQPRQVA | VWFQNR | RRARWK |    |    |
| PAD00461_1::Prunus              | LSVEQVKALEKKNFEVE    | NKL | EPER | KVQLAQE | LGLQPRQVA | VWFQNR | RRARWK |    |    |
| PPG03907_1::Physcomitrella      | LSLEQVRSLEARNFEVE    | NKL | EPER | KMQLAKE | LGLQPRQVA | VWFQNR | RRARWK |    |    |
| AMF15721_1::Ambystoma           | YTRQOVLELEKEFHYN     | RYL | TRRR | RIEIAHS | LCLSERQIK | IWFQNR | RMKWK  |    |    |
| CSH18746_1::Ciona               | YTKFQLAELEREFETAN    | EFI | SREM | REEIATR | VGLNDRQVK | IWFQNR | RMKCKR |    |    |
| IPD19513_1::Ictalurus           | YTRQOVLELEKEFHFN     | RYL | TRRR | RIEIAHT | LCLSERQIK | IWFQNR | RMKWK  |    |    |
| SPE27756_1::Strongylocentrotus  | YSKLQIYELEKEFETT     | MYL | TRDR | RSKLSQA | LDLTERQVK | IWFQNR | RMKMK  |    |    |
| SRP01584_1::Oryzias_latipes     | FTTHQLTELEKEYYTS     | KYL | DRSR | RREIAKQ | LALNETQVK | IWFQNR | RMKEK  |    |    |
| 1b72a::HUMAN                    | LRTNFTTRQLTELEKEFHFN | KYL | SRAR | RVEIAAT | LELNETQVK | IWFQNR | RMKQK  |    |    |
| ACF04417_1::Allium              | LTIEQVRTLEKSFEEVG    | NKL | EPER | KMQLARA | LGLQPRQVA | IWFQNR | RRARWK |    |    |
| ACF08359_1::Allium              | LSVTQVQFLEKSFEEV     | NKL | EPER | KVQLAKE | LGLQPRQVA | IWFQNR | RRARWK |    |    |
| BNP01381_1 Arabidopsis_thaliana | LTSQVHLLKESFETE      | NKL | EPER | KTQLANK | LGLQPRQVA | VWFQNR | RRARWK |    |    |
| BVP01068_1::Ricinus_communis    | LSVEQVQFLEKSFEEV     | NKL | EPER | KVQLAKD | LGLQPRQVA | IWFQNR | RRARWK |    |    |
| CSE02860_1::Citrus              | LTVDQVQFLEKSFEEV     | NKL | EPER | KIQLAKD | LGLQPRQVA | IWFQNR | RRARWK |    |    |
| CSE16705_1::Citrus              | LTSDQLESLEERSFQEE    | IKL | DPDR | KMKLARE | LGLQPRQIA | VWFQNR | RRARWK |    |    |
| GRD03861_1::Gossypium           | LSVDQVKALEKKNFEVE    | NKL | EPER | KVQLAQE | LGLQPRQVA | VWFQNR | RRARWK |    |    |
| GRD06591_1::Gossypium           | LTVDQIQFLEKSFEEVD    | NKL | EPER | KIQLAKD | LGLQPRQVA | IWFQNR | RRARWK |    |    |
| JRP02068_1::Picea_sitchensis    | LTADQVQFLEKSFEEVD    | NKL | EPER | KSQLAKD | LGLQPRQVA | IWFQNR | RRARWK |    |    |
| MSE04106_1::Medicago            | LSXDQVQFLEKSFEEED    | SKL | EPER | KTKLAKD | LGLQPRQVA | IWFQNR | RRARWK |    |    |
| PED06136_1::Populus             | LTVDQVQFLEKSFEELE    | NKL | EPER | KIQLAKD | LGLQPRQVA | IWFQNR | RRARWK |    |    |
| PTE03183_1::Poncirus            | LSVDQVKALEKKNFEVD    | NKL | EPER | KVQLAQE | LGLQPRQVA | VWFQNR | RRARWK |    |    |
| SMP00439_1 Vitis_vinifera       | LTPEQVHMLEKSLEAE     | NKL | EPER | KTQLAKK | LNLQPRQVA | VWFQNR | RRARWK |    |    |

|                                      |       |                     |     |      |          |           |        |         |
|--------------------------------------|-------|---------------------|-----|------|----------|-----------|--------|---------|
| O42365::Danio_rerio                  | RRLR  | TAYTNTQLLELEKEEFHFN | KYL | CRPR | RVEIAAL  | LDLTERQVK | VWFQNR | RRMKHKR |
| P09022::MOUSE                        | RTNF  | TTKQLLELEKEEFHFN    | KYL | TRAR | RVEIAAS  | LQLNETQVK | IWFQNR | RMKQKK  |
| AMF10171_1::Ambystoma                |       | YTDHQRLELEKEEFHYS   | RYI | TIRR | KAELAMA  | LGLSERQVK | IWFQNR | RAKERK  |
| BFP09676_1::Branchiostoma_florida    |       | YSDHQRLELEKEEFYSN   | KYI | TIKR | KVQLANE  | LGLSERQVK | IWFQNR | RAKQRK  |
| BMD62527_1::Bombyx                   |       | FTGTQLLELEREFMSN    | MYL | SRLR | RIEIASR  | LKLSEKQVK | IWFQNR | KVKLXK  |
| CVP02277_1::Saccoglossus_kowalevskii |       | FSDQQLNGLEKRFEAQ    | RYL | STPE | RVELANQ  | LSLSETQVK | TWFQNR | RMKHKK  |
| GAP01770_1::Ornithorhynchus_anatinus |       | FTNHQIYELEKRFYLYQ   | KYL | SPAD | RDQIAQQ  | LGLTNAQVI | TWFQNR | RAKLKR  |
| HCG02656_1::Homalodisca              |       | YTDHQRLELEKEEFHYS   | RYI | TIRR | KAELATN  | LGLSERQVK | IWFQNR | RAKERK  |
| IPD17949_1::Ictalurus                |       | FTHLQVLELEKKSFRQ    | RYL | SAPF | RAHLASA  | LRLTETQVK | IWFQNR | RYKTKR  |
| SPE19093_1::Strongylocentrotus       |       | FSGRQIFLELEKQFEVK   | KYL | SASE | RAELASL  | LNVTDQVK  | IWFQNR | RTKWKK  |
| lpufA::MOUSE                         | RKKRC | PTYKHQTLLEKEEFLFN   | MYL | TRDR | RYEVARL  | LNLTERQVK | IWFQNR | RMKMKK  |
| ACF08945_1::Allium                   |       | LSITQVQFLEKSFEVE    | NKL | EPER | KVQLAKE  | IGLQPRQVA | IWFQNR | RARWK   |
| BRE05356_1::Brassicarapa             |       | LSVVQVKALEKNFEID    | NKL | XPER | KVKLAQE  | LGLQPRQVA | IWFQNR | RRARWK  |
| BVP03504_1 Vitis_vinifera            |       | LSVDQVKALERNFEVE    | NKL | EPER | KVKLAQE  | LGLQPRQVA | VWFQNR | RRARWK  |
| GAD16259_1::Gossypium                |       | LTQEQVDLLELNFGNE    | HKL | ESER | KDRLEASE | LGLDPRQVP | VWFQNR | RRARWK  |
| GGP01641_1::Glycine_max              |       | LTPEQVRSLETSEFESE   | NKL | EPDR | KLKLAQQ  | LGLQPRQVA | VWFQNR | RRARWK  |
| GRD00608_1::Gossypium                |       | LSVDQVKALEKNFEVE    | NKL | EPDR | KSKLAQE  | LGLQPRQVA | VWFQNR | RRARWK  |
| GRD07392_1::Gossypium                |       | LTVDQVQFLEKSFEAE    | NKL | EPDR | KVQLAKD  | LGLQSRQVA | IWFQNR | RRARWK  |
| JRP00287_1::Vitis_vinifera           |       | LSVDQVKALEKNFEVE    | NKL | EPER | KVKLAQE  | LGLQPRQVA | VWFQNR | RIARWK  |
| LUP01153_1 Ricinus_communis          |       | FTDEQIKSLESIFESE    | TRL | EPK  | KVQLAKE  | LGLQPRQVA | IWFQNR | KRARWK  |
| PPE01139_1::Prunus                   |       | LTVDQVQFLEKSFDFME   | NKL | EPER | KILLAKD  | LGLQPRQVA | IWFQNR | RRARWK  |
| PSE12995_1::Picea                    |       | LSLQVRSLEKTFEVE     | NKL | EPER | KLQLAQE  | LGLQPRQIA | VWFQNR | RRARWK  |
| RPP00443_1::Phaseolus_vulgaris       |       | LSVDQVKALEKNFEVE    | NKL | EPDR | KVKLAQE  | LGLQPRQVA | VWFQNR | RRARWK  |
| SMP04043_1::Catharanthus_roseus      |       | LTAEQVQFLEKSFAVE    | NKL | EPDR | KNELAKK  | LGLQPRQVA | IWFQNR | RRARSK  |
| TVD00827_1::Triphysaria              |       | LNNEQVRTLEKNFELG    | NKL | EPER | KIELARA  | LGLQPRQIA | IWFQNR | RRARWK  |
| 1b8iA::Drosophila_melanogaster       | RQTY  | TRYQTLELEKEFHTN     | HYL | TRRR | RIEMAHA  | LSLTERQIK | IWFQNR | RMKCLKK |
| BME03454_1::Boophilus                |       | FTTQQLLALERKFRVK    | QYL | SIAE | RAEFSSS  | LNLTERQVK | IWFQNR | RAKEKR  |
| MCP00368_1::Priapulus_caudatus       |       | YGKGQTDLETEYCTS     | PYV | TKQR | RYELSRK  | LGLTERQVK | IWFQNR | RMKTKK  |
| SPE27538_1::Strongylocentrotus       |       | FSRSQVQLESTFEVK     | RYL | SSSE | RAGLAAN  | LHLTERQVK | IWFQNR | RNKWKR  |
| SPE27764_1::Strongylocentrotus       |       | FTREQIGLEKEFARE     | NYV | SRPK | RCELATA  | LNLPTTIK  | VWFQNR | RMKDKR  |
| SSF01710_1::Salmo                    |       | FTELQLMGLEKRFKQ     | KYL | STPD | RIDLAEK  | LDSLQIVK  | TWYQNR | RMKWKK  |
| SSF11513_1::Salmo                    |       | YTDHQRLELEKEEFHYS   | RYI | TIRR | KAELATS  | LGLSERQVK | IWFQNR | RAKERK  |
| TCF01014_1::Tribolium                |       | YTSACLVELEREFHHG    | KYL | SRPR | RIQIAEN  | LNLSEKQIK | IWFQNR | RMKHKK  |
| 1hom::Drosophila_melanogaster        | KRGR  | QTYTRYQTLELEKEEFHFN | RYL | TRRR | RIEIAHA  | LCLTERQIK | IWFQNR | RMKWKK  |
| O43365::HUMAN                        | KRAR  | TAYTSAQLVELEKEEFHFN | RYL | CRPR | RVEMANL  | LNLTERQIK | IWFQNR | RMKYKK  |
| P04476::XENLA                        | KRGR  | QTYTRYQTLELEKEEFHFN | RYL | TRRR | RIEIAHT  | LCLTERQIK | IWFQNR | RMKWKK  |
| P06798::MOUSE                        | KRSR  | TAYTRQQVLELEKEEFHFN | RYL | TRRR | RIEIAHT  | LCLSERQVK | IWFQNR | RMKWKK  |
| P09023::MOUSE                        | RRGR  | QTYTRYQTLELEKEEFHYN | RYL | TRRR | RIEIAHA  | LCLTERQIK | IWFQNR | RMKWKK  |
| P09024::MOUSE                        | KRGR  | QTYTRYQTLELEKEEFHYN | RYL | TRRR | RIEIAHT  | LCLTERQIK | IWFQNR | RMKWKK  |
| P14150::SCHAM                        | KRPRT | AFSGQLARLKHEFTEN    | RYL | TERR | RQELARE  | LGLNEAQIK | IWFQNR | KRAKIKK |
| Q05640::Artemia_franciscana          | KRPRT | AFTAELSLRLKHEFNEN   | RYL | TERR | RQDLARE  | LGLHENQIK | IWFQNR | RAKLKK  |
| AAF03294_1::Acorus                   |       | LSVEQVRILEKNFELG    | NKL | EPER | KMQLARA  | LGLQPRQIA | IWFQNR | RRARWK  |
| BNP04867_1 Arabidopsis_thaliana      |       | LSDEQVRMLEMSFGLG    | HKL | ESER | KNRLASE  | LGLDSRQVA | VWFQNR | RRARWK  |
| CND18854_1::Filobasidiellaneoformans |       | TTPEQLKLVLEFWYDIN   | PKP | DNQL | REQLAAQ  | LGMTKRNQV | VWFQNR | RAKMK   |
| CRP01704_1::Ceratopteris_richardii   |       | LTAEQVNFLETSEFSMD   | LKL | EPER | KAHLAKQ  | LGIQPRQVA | IWFQNR | RRARWK  |
| CRP03497_1::Ceratopteris_richardii   |       | LTAEQVNFLEMSFNID    | LKL | EPER | KALLAKK  | LGIQPRQVA | IWFQNR | RRARWK  |

|                                          |                         |     |       |          |            |              |
|------------------------------------------|-------------------------|-----|-------|----------|------------|--------------|
| CSE16783_1::Citrus                       | LTAEQAELEEMHFGNE        | HKL | ESDR  | KDKLAAE  | LGLDPRQVA  | VWFQNRARDK   |
| GHP07947_1::Ricinus_communis             | FSDEQIKSLELMFESE        | TRL | EPGK  | KLEVAKE  | LGLHPRQVA  | IWFQNKRARWK  |
| GRD02024_1::Gossypium                    | LTATQVEFLERSFEVE        | NKL | ESDR  | KLRLAKE  | LGLQPRQVA  | IWFQNRARSK   |
| GRD28327_1::Gossypium                    | FSDEQIRLLESIFESE        | TKL | EPRK  | KMQLARE  | LGLQPRQVA  | IWFQNRARWK   |
| HAD01492_1::Helianthus                   | LTTDQVQFLEKSF DEN       | NKL | EPER  | KVHLAKE  | LNLQPRQVA  | IWFQNR       |
| PPE01722_1::Prunus                       | FSDEQIRLSLESLF ESE      | SRL | EPRK  | KMQLAKE  | LGLQPRQVA  | IWFQNKRARWK  |
| PPG05037_1::Physcomitrella               | LSKEQSALLEESFKEH        | STL | NPQK  | KNALAKQ  | LGLRPRQVE  | VWFQNRARTK   |
| PSE02887_1::Picea                        | LSKEQSALLEESFKEN        | SSL | NPQK  | KQALAKR  | LNLRPRQVE  | VWFQNRARTK   |
| PSE04668_1::Picea                        | LSKEQSALLEESFLEH        | STL | NPQK  | KNALAKE  | LNLQPRQVE  | VWFQNRARTK   |
| ZEP07385_1 Arabidopsis_thaliana          | LTKEQSALFLEDSFKEH       | STL | NPQK  | KQALAKQ  | LNLRPRQVE  | VWFQNRARTK   |
| 3hddA::Drosophila_melanogaster           | RTAFSSQLARLKR EFNEN     | RYL | TERR  | RQQLSSE  | LGLNEAQIK  | IWFQNKRAKIKK |
| AME09631_1::Apis                         | FNSWQLEELERAF LSS       | HYP | DVFM  | REALAVR  | LELKE SRVA | VWFQNRRAKWRK |
| AMF10710_1::Ambystoma                    | YTDHQRLLELEKEFHYN       | RYI | TITR  | KAQLAAN  | LRLSERQIK  | IWFQNRRAKERK |
| ASP02539_1 Brugia_malayi                 | FTTFQLHELEQAF EKC       | HYP | DVYA  | RELLAQK  | VKLPEVRVQ  | VWFQNRRAKWRR |
| ASP08402_1::Caenorhabditis_briggsae_AF16 | YTDYQRLLELEKEFRIT       | QFI | NSER  | KSQLSSE  | LQLTERQIK  | IWFQNRRAKDRR |
| ASP20371_1::Caenorhabditis_elegans       | FTPTQADTLEKEYLTD        | QYM | PRTR  | RILIAES  | LGLSEGQVK  | TWFQNRRAKEKR |
| AYP03228_1::Brugia_malayi                | FSAYQLDELEKVFART        | HYP | DVFT  | REELAQR  | VTLTEARVQ  | VWFQNRRAKFRK |
| BFP10457_1::Branchiostoma_floridae       | YSQWQLELEKAFETT         | QYP | DIFM  | REALALR  | LDLIEARVQ  | VWFQNRRAKLRR |
| CSG02378_1::Callinectes                  | FSQAQVYELERRFKQQ        | RYL | SAP E | REHLAGL  | LKLTSTQVK  | IWFQNRRYKCKR |
| ECD01305_1::Equus                        | FSHTQVXELERKFXRQ        | KYL | SAP E | RAHLAXN  | LKLT EXQVK | IWFQNRRYKTKR |
| IFP07589_1::Danio_erio                   | FSKAQTYELERRFRQQ        | RYL | SAQE  | REQLAHL  | LRLTPTQVK  | IWFQNHRYKMKR |
| IPD18117_1::Ictalurus                    | FSQAQVLELERRFKQQ        | RYL | SAP E | REHLANT  | LKLTSTQVK  | IWFQNRRYKCKR |
| P31535::MYXGL                            | ADQLARLRAEFQAN          | RYL | TEER  | RQNLARE  | LSLNEAQIK  | IWFQNKRAKIKK |
| SPE27868_1::Strongylocentrotus           | FTTFQLHQLERAFDMT        | QYP | DVFM  | REELALR  | LDLSESRVQ  | VWFQNRRAKWRK |
| SSF27381_1::Salmo                        | FPPSQVELEKVFLET         | HYP | DVHI  | RDKLASR  | LQLTEGRVQ  | IWFQNRRAKWRK |
| SSF54974_1::Salmo                        | FSKRQIFQLESTFDMK        | RYL | SSAE  | RACCLASS | LQLTETQVK  | IWFQNRNKLKR  |
| SSP03100_1::Brugia_malayi                | FSRHQVSLQEMTFDMK        | RYL | SSQE  | RAHLASN  | LQLTETQVK  | IWFQNRNKKWR  |
| TCP00488_1::Caenorhabditis_elegans       | FTPAQADTLEKEYLTD        | QYM | PRTR  | RILIAES  | LGLNEGQVK  | TWFQNRRAKEKR |
| WBP00763_1 Brugia_malayi                 | FTQSQVNELEERFKLQ        | RYV | NAAE  | RERLAVT  | LGLTSTQVK  | IWFQNRRYKCKR |
| O09113::MOUSE                            | KRHRTRFTPAQLNELERSFAKT  | HYP | DIFM  | REELALR  | IGLTESRVQ  | VWFQNRRAKWKK |
| O13074::FUGRU                            | KRSRTAYTRQQVLELEKEFHYN  | RYL | TRRR  | RVEIAHT  | LCLSERQIK  | IWFQNRMMKWKK |
| O42115::Danio_erio                       | RRYRTTFTSYQLEELERAFQKT  | HYP | DVFT  | REELAMR  | LDLTEARVQ  | VWFQNRRAKWRK |
| O42368::Danio_erio                       | KRARTAYTSAQLVLELEKEHFHN | RYL | CRPR  | RVEMANL  | LNLSESRQIK | IWFQNRMMKYKK |
| O57374::Danio_erio                       | KRSRTAYTRQQVLELEKEHFHN  | RYL | TRRR  | RIESAHT  | LSLSESRQIK | IWFQNRMMKWKK |
| P02832::XENLA                            | RRGRQIYSRYQTLELEKEHFHN  | RYL | TRRR  | RIEIANA  | LCLTERQIK  | IWFQNRMMKWKK |
| P07548::Drosophila_melanogaster          | KRQRTAYTRHQIILELEKEFHYN | RYL | TRRR  | RIEIAHT  | LVLSESRQIK | IWFQNRMMKWKK |
| P09013::Danio_erio                       | KRARTAYTRYQTLELEKEHFHN  | RYL | TRRR  | RIEIAHA  | LCLSERQIK  | IWFQNRMMKWKK |
| P09016::HUMAN                            | KRSRTAYTRQQVLELEKEHFHN  | RYL | TRRR  | RIEIAHT  | LCLSERQIK  | IWFQNRMMKWKK |
| P09017::HUMAN                            | KRSRAAYTRQQVLELEKEFHYN  | RYL | TRRR  | RIEIAHS  | LCLSERQIK  | IWFQNRMMKWKK |
| P09019::XENLA                            | KRARTAYTRYQTLELEKEHFHN  | RYL | TRRR  | RIEIAHT  | LCLSERQIK  | IWFQNRMMKWKK |
| P09020::XENLA                            | KRSRTSYTRYQTLELEKEHFHN  | RYL | TRRR  | RIEIANN  | LCLNERQIK  | IWFQNRMMKWKK |
| P23397::HELTR                            | KRPRTAFTGDLARLKR EFS EN | KYL | TEQR  | RTCLAKE  | LNLNESQIK  | IWFQNKRAKMKK |
| P31533::Danio_erio                       | KRPRTAFTAELQRLKNEFQNN   | RYL | TEQR  | RQALAQE  | LGLNESQIK  | IWFQNKRAKIKK |
| P34326::Caenorhabditis_elegans           | KRPRTAFTGDLRLKTEFRES    | RYL | TEKR  | RQELAHE  | LGLNESQIK  | IWFQNKRAKLLK |
| P52730::XENLA                            | KRPRTAFTAELQRLKA E FQTN | RYL | TEQR  | RQSLAQE  | LGLNESQIK  | IWFQNKRAKIKK |
| AOP03183_1 Vitis_vinifera                | LSKEQSRLL EESFRQN       | HTL | NPTQ  | KEALASR  | LRLKPRQVE  | VWFQNRARTK   |

BNP04177\_1|Arabidopsis\_thaliana -----FSDEQIKSLEMMFSE-----TKL-----EPRK-----KVQLARE-----LGLQPRQVA-IWFQNKRARWK-----  
 BNP18445\_1|Arabidopsis\_thaliana -----LTSGQLASLERSFQED-----IKL-----DSDR-----KLKLSRE-----LGLQPRQIA-VWFQNRRARWK-----  
 CJP00479\_1::Picea\_sitchensis -----LSKEQSALLEESFREH-----STL-----NPKQ-----KNALAKQ-----LNLRRPQVE-VWFQNRARTK-----  
 CSE03377\_1::Citrus -----FSDEQIRSLLELMFENE-----TRL-----EPRK-----KLQLAKE-----LGWQPRQVA-IWFQNKRARWK-----  
 CSE04725\_1::Citrus -----LSKDQSAILEESFKEH-----NTL-----NPKQ-----KLALAKQ-----LGLRPRQVE-VWFQNRARTK-----  
 CSE14614\_1::Citrus -----LSKEQSAFLEESFKEH-----NTL-----NPKQ-----KLALAKQ-----LNLRRPQVE-VWFQNRARTK-----  
 GAD15382\_1::Gossypium -----LSKDQSAILEENFKEH-----NTL-----NPKQ-----KLALAKQ-----LGLRPRQVE-VWFQNRARTK-----  
 GRD08825\_1::Gossypium -----LSKDQSAILEESFKEH-----NTL-----NPKQ-----KMALAKQ-----LGLRPRQVE-VWFQNRARTK-----  
 GRD15275\_1::Gossypium -----FSDEQIKSLELMFSE-----TRL-----EPRK-----KLQVAKE-----LGLQPRQVA-IWFQNKRARWK-----  
 GRD29631\_1::Gossypium -----LSKDQSAILEECFKEH-----NTL-----NPKQ-----KLALAKQ-----LGLRPRQVE-VWFQNRARTK-----  
 PED03264\_1::Populus -----FSDEQIKSLETMFSE-----TRL-----EPRK-----KMQLARE-----LGLQPRQVA-IWFQNKRARWK-----  
 PED07486\_1::Populus -----LSKDQSAFLEESFKEH-----NTL-----TPKQ-----KLALAKE-----LNLRRPQVE-VWFQNRARTK-----  
 RPP00177\_1|Glycine\_max -----LSKDQSIILEESFKEH-----NTL-----NPKQ-----KSALAKQ-----LGLRARQVE-VWFQNRARTK-----  
 SSF35481\_1::Salmo -----FTDHQLAQLERSFERQ-----KYL-----SVQD-----RME LAAS-----LNLTDTVQVK-TWYQNR-----  
 1jggA|Drosophila\_melanogaster -----RYRTAFTRDQLGRLEKEFYKE-----NYV-----SRPR-----RCELAAQ-----LNLPESTIK-VWFQNRMKDKR-----  
 CCE05724\_1::Cyprinus -----FTTSQLLVLERKFLQK-----QYL-----SIAE-----RAEFNS-----LNLTTETQVK-IWFQNRTRAKAKR-----  
 P31537::XENLA -----AEQLQRLKAQEFQAN-----RYI-----TEQR-----RQSLAQE-----LSLNEQIK-IWFQNKRAKIKK-----  
 PBP05845\_1::Anopheles\_gambiae\_str.\_PEST -----FSKSQTFELERRFKQA-----RYL-----SAPE-----REHLASM-----INLTPQVK-IWFQNHRYKTKR-----  
 SSF22556\_1::Salmo -----FSRVQICELEKRFHRQ-----KYL-----ASAE-----RATLAKS-----LKMTDAQVK-TWFQNRRTKWR-----  
 O15266::HUMAN -----RRSRTNFTLEQLNELERLFD-----HYP-----DAFM-----REELSQR-----LGLSEARVQ-VWFQNRRAKCRK-----  
 O35137::MOUSE -----RRNRFTFTSYQLEELKVFQKT-----HYP-----DVYA-----REQLAMR-----TDLTEARVQ-VWFQNRRAKWRK-----  
 P09076::Apis -----KRPRTAFAEQQLARLKREFAEN-----RYL-----TERR-----RQQLSRD-----LGLTEAQIK-IWFQNKRAKIKK-----  
 P09145::DROVI -----KRPRTAFSSEQLARLKREFNEN-----RYL-----TERR-----RQQLSSE-----LGLNEAQIK-IWFQNKRAKIKK-----  
 P19622::HUMAN -----KRPRTAFTAQQLQRLKAQFQTN-----RYL-----TEQR-----RQSLAQE-----LSLNEQIK-IWFQNKRAKIKK-----  
 P27609::BOMMO -----KRPRTAFSGAQLARLKHEFAEN-----RYL-----TERR-----RQSLAAE-----LGLAEAQIK-IWFQNKRAKIKK-----  
 P27610::BOMMO -----KRPRTAFSGPQLARLKHEFAEN-----RYL-----TERR-----RQSLAAE-----LGLAEAQIK-IWFQNKRAKIKK-----  
 AAF02115\_1::Acorus -----LSKDQSAVLEESFKEH-----STL-----NPKQ-----KLALAKQ-----LNLRRPQVE-VWFQNRARTK-----  
 ACF09585\_1::Allium -----LSKDQSRLLLEEFKEH-----STL-----NPKQ-----KQALAKH-----LNLQPRQVE-VWFQNRARTK-----  
 ASP07310\_1::Caenorhabditis\_elegans -----YTRNQVLELEKEFHFN-----KYL-----TRKR-----RIEIAHS-----LMLTEHQVK-IWFQ-----  
 GRD07374\_1::Gossypium -----LTKDQSALLEESFKQH-----STL-----NPKQ-----KQALAKQ-----LNLRRPQVE-VWFQNRARTK-----  
 GRD21285\_1::Gossypium -----LSKEQSLVLEETFKEH-----STL-----NPKQ-----KLALAMQ-----LNLRRPQVE-VWFQNRARTK-----  
 HAD09917\_1::Helianthus -----LSKEQSAYLEETFKEH-----NTL-----NPKQ-----KLALAEQ-----LHLRPRQVE-VWFQNRARTK-----  
 JRP01754\_1|Populus\_trichocarpa -----LTKEQSALLEESFKQH-----STL-----NPKQ-----KQALARQ-----LNLRRPQVE-VWFQNRARTK-----  
 MCP03763\_1::Nasonia\_vitripennis -----FSDQQLQGLEQRFNGQ-----KYL-----STPE-----RISLAES-----LHLSSETQVK-TWFQNRMK-----  
 PGD09699\_1::Picea -----LSKDQSSLLEESFREH-----SAL-----SPKH-----KSALACK-----LNLQPRQVE-VWFQNRARTK-----  
 PPE02653\_1::Prunus -----LSKEQSATLEDSFREH-----TTL-----NPKQ-----KQDLARK-----LNLRRPQVE-VWFQNRARTK-----  
 RHD00015\_1::Rosa -----LSKDQSAILEESFKDH-----NTL-----NPKQ-----KLALAKQ-----LGLRPRQVE-VWFQNRARTK-----  
 lig7A::MOUSE -----RKPRTPFTTAQLLALERKFRQK-----QYL-----SIAE-----RAEFSS-----LSLTTETQVK-IWFQNRRAKAKR-----  
 O02491::Anopheles\_gambiae\_str.\_PEST -----KRPRTAFSNAQLQRLKNEFNEN-----RYL-----TEKR-----RQTLSE-----LGLNEAQIK-IWFQNKRAKIKK-----  
 O35602::MOUSE -----RRNRFTFTTYQLHELERAFEKS-----HYP-----DVYS-----REELAGK-----VNLPEVRVQ-VWFQNRRAKWR-----  
 O35690::MOUSE -----RRIRTTFTSAQLKELERVFAET-----HYP-----DIYT-----REELALK-----IDLTEARVQ-VWFQNRRAKFRK-----  
 O42250::Danio\_erio -----RRHRVTFVTSQLEELKAFNEA-----HYP-----DVYA-----REMLAMK-----TELPEDRIQ-VWFQNRRAKWRK-----  
 O42358::Danio\_erio -----RRNRFTFTTYQLHELERAFEKS-----HYP-----DVYS-----REELALK-----VNLPEVRVQ-VWFQNRRAKWR-----  
 O42567::XENLA -----RRNRFTFTTYQLHELERAFEKS-----HYP-----DVYS-----REELAMK-----VNLPEVRVQ-VWFQNRRAKWR-----  
 O70137::MOUSE -----RRNRFTFTTYQLHELERAFEKS-----HYP-----DVYA-----REQLALR-----TDLTEARVQ-VWFQNRRAKWRK-----  
 P05527::Drosophila\_melanogaster -----KRPRTAFSGTQLARLKHEFNEN-----RYL-----TEKR-----RQQLSGE-----LGLNEAQIK-IWFQNKRAKIKK-----

P09075::Apis -----KRPRTAFSGEQ LARLKREFAE N-----RYL-----TERR-----RQQLSRD-----LGLNEA QIK-IWFQNKRAKIKK-----  
 P31538::XENLA -----KRPRTAFTA EQ LRLKAEFQAN-----RYI-----TEQR-----RQTLAQE-----LSLNESQIK-IWFQNKRAKIKK-----  
 P52729::XENLA -----KRPRTAFTADQLRLKAEFQTN-----RYL-----TEQR-----RQSLAQE-----LSLNESQIK-IWFQNKRAKIKK-----  
 Q04896::Danio\_rerio -----KRPRTAFTA EQ LRLKAEFQTS-----RYI-----TEQR-----RQALARE-----LGLNESQIK-IWFQNKRAKIKK-----  
 Q05916::CHICK -----KRPRTAFTA EQ LRLKAEFQAN-----RYI-----TEQR-----RQSLAQE-----LSLNESRVK-IWFQNKRAKIKK-----  
 AMF10979\_1::Ambystoma -----FSKAQTLQLERRFRQQ-----RYL-----SAPE-----RDHLAHL-----LHLTPTQVK-IWFQNHRYKMKR-----  
 AYP02578\_1::Caenorhabditis\_elegans -----FTQEQLAELDSAFQKS-----HYP-----DIYV-----REELARI-----TKLNEARIQ-VWFQNRRAKHRK-----  
 CSE04691\_1::Citrus -----FSDEQIRLLESIFES E-----TKL-----EPRK-----KMQVATE-----LGLQPRQVA-IWFQNKRARWK-----  
 MIP05372\_1::Convolutriloba\_longifissura -----FSQQQVCELEKMFQRK-----KYL-----NAPE-----RESLAQA-----IGLKPTQVK-IWFQNHRYKCKR-----  
 PPP02701\_1::Pristionchus\_pacificus -----YSDIYIRLELEKEFH MN-----QFI-----NADR-----KADLATK-----LNLTERQIK-IWFQNRRAKRR-----  
 SPE35398\_1::Strongylocentrotus -----FSKAQTYELERRFRQQ-----RYL-----SAPE-----REHLASI-----IRLSPTQVK-IWFQNHRYKLR-----  
 SRP04407\_1::Caenorhabditis\_elegans -----FTQEQLAELDNAFQKS-----HYP-----DIYV-----REELARI-----TKLNEARIQ-VWFQNRRAKHRK-----  
 SSF10042\_1::Salmo -----FTSAQLEVLERFFQES-----QYP-----DIHS-----RELLASQ-----TQLSEARVQ-IWFQNRVVKWRK-----  
 O73917::Oryzias\_latipes -----RNRRTSFTQE QIEALEKEFERT-----HYP-----DVFA-----RERLAAK-----IDLPEARIQ-VWFSNRRAKWR-----  
 ACF08172\_1::Allium -----LSKDQSALEESFKGH-----NTL-----NPKQ-----KQALAKQ-----LNLRPRQVE-VWFQNRRAKTK-----  
 BNP12498\_1|Arabidopsis\_thaliana -----FSEEQIKSLEMMFSE-----TRL-----EPRK-----KVQLARG-----LSLQPRQVA-IWFQNKRARWK-----  
 BVP05281\_1|Vitis\_vinifera -----LTKDQSALEESFKQQ-----STL-----NPKQ-----KQALADR-----LNLRPRQVE-VWFQNRRAKTK-----  
 CSE21246\_1::Citrus -----LTKEQSALEESFKQH-----STL-----NPKQ-----KQALARQ-----LNLRPRQVE-VWFPNRRARTK-----  
 CSE25906\_1::Citrus -----LTQDQVRLEETCFNAN-----QKL-----QVDR-----KLELARR-----LGLPPRQIA-VWYQNRRAEK-----  
 GHP06126\_1::Gossypium\_arboreum -----TADQIREMEALFKES-----PHP-----DEKQ-----RQQLSKQ-----LGLAPRQVK-FWFQNRRTQIK-----  
 GMD03350\_1::Glossinamorsitans -----FSSFQRKLEIQFQQQ-----KYI-----TKPD-----RRKLAAR-----LNLTAQVK-VWFQNRMKWR-----  
 HAD05132\_1::Helianthus -----LSKEQSAYLEETFKEH-----NTL-----NPKQ-----KLALAEQ-----LHLRPRQVE-VWFQNRRAH-----  
 HVP89597\_1::Triticum\_aestivum -----LSKDQAAVLEECFKTH-----STL-----NPKQ-----KRALANR-----LGLRPRQVE-VWFQNRRAKTK-----  
 INP02125\_1::Populus\_trichocarpa -----LTKQQSIVLEDSFKQH-----TTL-----NSKQ-----KQELARR-----LNLRPRQVE-VWFQNRRAKTK-----  
 TMD04719\_1::Triticum -----LTAEQAALLEKSFRAH-----NVL-----SHGE-----KHDLAEQ-----LGLKPSKWK-VWFQNRRAKTK-----  
 lftz::Drosophila\_melanogaster -----KRTRTYTRYQTLLELEKEHF N-----RYI-----TRRR-----RIDIANA-----LSLSERQIK-IWFQNRMKSKK-----  
 lnk2P|Drosophila\_melanogaster -----RKRRVLFTKAQTYELERRFRQQ-----RYL-----SAPE-----REHLASL-----IRLTPQVK-IWFQNHRYKTKR-----  
 O18381::Drosophila\_melanogaster -----RRQRTHFTSQQLQELEHTFSRN-----RYP-----DMST-----REIAMW-----TNLTEARVR-VWFQNRRAKWRK-----  
 O35160::MOUSE -----RRQRTHFTSQQLQELEATFORN-----RYP-----DMST-----REIAVW-----TNLTEARVR-VWFQNRRAKWRK-----  
 O42477::Danio\_rerio -----RRHRTIFTSYELEELEKAFNEA-----HYP-----DVYA-----REMLAMK-----TELPEDRIQ-VWFQNRRAKWRK-----  
 P09532::TRIGR -----KRPRTAFSASQLRLKQEFQQS-----NYL-----TEQR-----RRSLAKE-----LTLSERQIK-IWFQNKRAKIKK-----  
 BMD62598\_1::Bombyx -----FTPQQLSELES LFQKT-----HYP-----DVFL-----REEVALR-----ISLSEARVQ-VWXQRRRAKWRK-----  
 HJP02417\_1::Paracoccidioides\_brasiliensis\_Pi -----ATQDQLTLEMEFNKNP-----TP-----TASV-----RDRI AEE-----INMTERS VQ-IWFQNRRAKIK-----  
 MIP04433\_1::Ovis\_aries -----FTQNQVTRLEYMFSIK-----HYL-----SAQE-----REQISSE-----IGLKPNQVK-IWFQNHRYKIKR-----  
 MIP04826\_1::Rattus\_norvegicus -----FTQNQVTRLEYMFSMK-----QYL-----SAQE-----REQISSE-----IGLKPNQVK-IWFQNHRYKIKR-----  
 SSF08630\_1::Salmo -----FSQAQVYELERRFKQQ-----KYL-----SAPE-----REHLASM-----IHLSPQVK-IWFQNHRYKMKR-----  
 AMF17136\_1::Ambystoma -----YSKGQLRELEKEYASS-----KFI-----TKDR-----RRQIATD-----TNLSERQIT-IWFQNRVKEK-----  
 BNP16314\_1::Arabidopsis\_thaliana -----HTTDQIRHMEALFKET-----PHP-----DEKQ-----RQQLSKQ-----LGLAPRQVK-FWFQNRRTQIK-----  
 CND11316\_1::Filobasidiellaneoformans -----TNDVQLAMLSDFVQRT-----QYP-----STEE-----RDELARQ-----LGMTSRSVQ-IWFQNRRAVK-----  
 IPD11218\_1::Ictalurus -----FTKEHLELLRMAFNVD-----PYP-----GISV-----RESLSQA-----TGLPESRIQ-VWFQNKRAR-----  
 SPE28460\_1::Strongylocentrotus -----FTRAQLDVLET LFSRT-----RYP-----DIFM-----REEVAMK-----INLPESRVQ-VWFKNRRACKR-----  
 PCE03163\_1::Phaseolus -----KTPFQLETLEKAYAVD-----NYP-----SETM-----RGELSEK-----LGLSDRQLQ-MWFCHRR LKDK-----  
 PGD06527\_1::Picea -----KTPQQVEGLESFYAEH-----KYP-----SEAM-----KAQLSEE-----LGLTEKQVQ-GWFC HRR LKDK-----  
 PTP01283\_1::Caenorhabditis\_elegans -----FNDTQLDELEKCFKMC-----QYP-----DVSL-----REKLSKE-----INLPEARIQ-VWFKNRC AKHRR-----  
 O15499::HUMAN -----RRHRTIFSEEQLQALEALFVQN-----QYP-----DVST-----RERLAGR-----IRLREERVE-VWFKNRRAKWR-----  
 O54751::MOUSE -----RRERTTFTRSQLEELEALFAKT-----QYP-----DVYA-----REEVALK-----INLPESRVQ-VWFKNRRACKR-----

|                                          |                             |     |      |             |           |              |
|------------------------------------------|-----------------------------|-----|------|-------------|-----------|--------------|
| EHP01599_1::Postia_placenta_Mad_698_R    | IPKHALQTLQVFKDD             | KFP | SVET | RKNLAAE     | LRVTPRQVQ | VWFQNKQR     |
| GAP02607_1::Oryzias_latipes              | FSESQMSALVQRFVQ             | RYL | TPAE | MKNLAKM     | TGLTXQVQK | TWFQNR       |
| INP04052_1::Mirabilis_jalapa             | FSNEQVKSLLETIFKLE           | TKL | ETKK | KLQVARD     | LGLQPRQVA | IWFQNKARWK   |
| OOP03311_1::Caenorhabditis_elegans       | FNRRQQLVLETLFEAT            | QYP | DVFT | REKVAEQ     | IQLQESRIQ | VWFKNRRAKHR  |
| SMP06236_1 Vitis_vinifera                | LNQEQVRLLEASFDAG            | KKL | EPER | KFQLARD     | LGVPPRQIA | IWYQNKRARWK  |
| SRD01034_1::Stevia                       | FTDKQISFLEYMFETQ            | SRP | ELRM | KHQLAHK     | LGLHPRQVA | IWFQNKRARSK  |
| 1fjl1::Drosophila_melanogaster           | RRSRRTTFASQLDELERAFERT      | QYP | DIYT | REELAQR     | TNLTEARIQ | VWFQNRRLRLRK |
| 1ftt::Rattus_norvegicus                  | RKRRVLFSAQVYELERRFKQQ       | KYL | SAPE | REHLASM     | IHLTPTQVK | IWFQNHRYKMKR |
| BMD20907_1::Bombyx                       | FTGDQQLRLEQLTLEKT           | QYI | NGTD | RRELAQK     | WGIGEKGIK | IWFQNRMMKNKR |
| BMD49473_1::Bombyx                       | FTTEQINYLENEFKKS            | HYI | SAVQ | RKEIANI     | VNVPKVIK  | IWFQNRMRREKK |
| CPG01541_1::Coccidioides                 | LTKEQVETLEAQFRAQP           | KP  | TSNV | KRQLAMQ     | TNLTLPRVA | NWFQNRRAKEK  |
| O43316::HUMAN                            | RRRTTFSPSQAEALEKEFQRG       | QYP | DSVA | RGKLATA     | TSLPEDTVR | VWFSNRRAKWRR |
| ACF11510_1::Allium                       | YTPEQVEALERVYSEC            | PKP | SSIR | RQQLIRECPIL | SNIEPKQIK | VWFQNRRCREK  |
| CSE21677_1::Citrus                       | YTPEQVEALERLYHEC            | PKP | SSMR | RQQLIRECPIL | SNIEPKQIK | VWFQNRRCREK  |
| IPD21151_1::Ictalurus                    | FSKQATEVLNEYFYSHLSNPYP      |     | SEEA | KEELAKQ     | CGITVSQVS | NWFGNKRIRYKK |
| PCE03158_1::Phaseolus                    | EQVEALERLYHEC               | PKP | SSLR | RQQLKKECPIL | CNIEPKQIK | VWFQNRRCREK  |
| PPD21046_1::Pongo                        | FNKQVTEILNEYFYSHLSNPYP      |     | SEEA | KEELAKK     | CGITVSQVS | NWFGNKRIRYKK |
| P36200::XENLA                            | KRPRTTITAKQLETLKNAYNNS      | PKP | ARHV | REQLSSE     | TGLDMRVVQ | VWFQNRRAKEKR |
| P50481::MOUSE                            | KRPRTTITAKQLETLKSAYNTS      | PKP | ARHV | REQLSSE     | TGLDMRVVQ | VWFQNRRAKEKR |
| INP10932_1::Petroselinum_crispum         | FGEDAIAKRLNEAFKEN           | HYP | KRNV | KESLARE     | LGLTLRQVD | KWFGNSR      |
| TVE09682_1::Trichomonas                  | FNKEQKIKLERIFKIN            | PTP | KIRQ | RDEIARE     | LNIPLKSVT | YWFQNR       |
| BNP10524_1::Arabidopsis_thaliana         | KTPFQLQTLLEEVYAE            | TYP | SEAT | RAELSEK     | LDLSRQLQ  | MWFCHRRLKDKK |
| CSE06316_1::Citrus                       | KTPAQVMALEKIFYNEH           | KYP | TEEM | KSQVAEQ     | IGLTEKQVS | GWFCHRRLKEKR |
| PBD14388_1::Paracoccidioides             | ATQDQLATLEMEFNKNP           | TP  | TAAV | REERIAEE    | INMTERSQV | IWFQNR       |
| SPE07312_1::Strongylocentrotus           | FTRNQVYSMERRFDQQ            | RYL | TSVE | RKEFSNS     | IGLDDHHVK | IWFQNRSSKLLK |
| TDP00719_1::Caenorhabditis_briggsae_AF16 | FTEAQSLLLEAFQES             | HYP | DQTA | KKDMAEK     | LDIPEDRIT | VWFQNRRAKWRR |
| WBP00326_1 Brugia_malayi                 | ISAKSLETLKQAYQAS            | SKP | ARHV | REQLAAD     | TGLDMRVVQ | VWFQNRRAKEKR |
| ACF08938_1::Allium                       | TAEQVEALERVYAEC             | PKP | SSMR | RQQLVRDCPIL | SNIEPKQIK | VWFQNRRCREK  |
| ACF10646_1::Allium                       | YTPEQVEALERVYSEC            | PKP | SSIR | RQQLIRECPIL | SNIEPKQIK | VWFQNRRCREK  |
| BVP09757_1 Vitis_vinifera                | YTPEQVEALERLYHDC            | PKP | SSLR | RQQLIRECPIL | SNIEPKQIK | VWFQNRRCREK  |
| GMD02533_1::Glossinamorsitans            | FSKQASEILNEYFYSHLSNPYP      |     | SEEA | KEELARK     | CGITVSQVS | NWFGNKRIRYKK |
| 1lfuP::MOUSE                             | RRKRRNFNKQATEILNEYFYSH      | PYP | SEEA | KEELAKK     | SGITVSQVS | NWFGNKRIRYKK |
| HGP09547_1::Tetraodon_nigroviridis       | ISSDQLDKLENVFEIR            | KHL | NASE | QGRLGKA     | IGLTEEQVN | EWFEQRNRWR   |
| Q62231::MOUSE                            | FKEKSRGVLREWYAHN            | PYP | SPRE | KRELAAE     | TGLTTTQVS | NWFKNRRQRDR  |
| Q9NPC8::HUMAN                            | FKEKSRVLEREWYAHN            | PYP | SPRE | KRELAAE     | TGLTTTQVS | NWFKNRRQRDR  |
| 1akhB::Saccharomyces_cerevisiae          | RGHRFTKENVRILESWFAKNIENPYL  |     | DTKG | LENLMKN     | TSLSRIQIK | NWVSNRRRKEKT |
| PBD05144_1::Paracoccidioides             | LTKEQVDTLAQFQHP             | KP  | NSNV | KRQLATQ     | TNLSLPRVA | NWFQNRRAKAK  |
| SPE02053_1::Strongylocentrotus           | FNLAQINALERIFLDV            | EYP | DGYL | KAKLANR     | LEVDENTVQ | IWFQNRRAKKR  |
| 1b72B::HUMAN                             | RKRRNFNKQATEILNEYFYSHLSNPYP |     | SEEA | KEELAKK     | CGITVSQVS | NWFGNKRIRYKK |
| 1b8iB Drosophila_melanogaster            | RRNFSKQASEILNEYFYSHLSNPYP   |     | SEEA | KEELARK     | CGITVSQVS | NWFGNKRIRYKK |
| O88609::MOUSE                            | KRPRTILTQQRRFAKASFEVS       | SKP | CRKV | RETLAAE     | TGLSVRVVQ | VWFQNRRAKMKK |
| P20154::Caenorhabditis_elegans           | RGPRTTIKAKQLETLKNAFAAT      | PKP | TRHI | REQLAAE     | TGLNMRVIQ | VWFQNRSSKERR |
| P20271::Caenorhabditis_elegans           | KRPRTTISAKSLETLKQAYQTS      | SKP | ARHV | REQLASE     | TGLDMRVVQ | VWFQNRRAKEKR |
| P37137::XENLA                            | RGPRTTIKAKQLETLKAAFIAT      | PKP | TRHI | REQLAQE     | TGLNMRVIQ | VWFQNRSSKERR |
| P48742::HUMAN                            | RGPRTTIKAKQLETLKAAFAAT      | PKP | TRHI | REQLAQE     | TGLNMRVIQ | VWFQNRSSKERR |
| P528::Danio_rerio                        | RGPRTTIKAKQLETLKAAFAAT      | PKP | TRHI | REQLAQE     | TGLNMRVIQ | VWFQNRSSKERR |

MIP05948\_1::Rattus\_norvegicus -----FSEEQICYLEDFFGNTC--HYP-----DSYQ-----KEEIIARR-----LNITTDRIIT-VWFQNRRSKFRK-----  
Q27350::Drosophila\_melanogaster -----FKEKRSRSLRDWYSHN--PYP-----SPRE-----KRDLEAE-----TGLTTTQVS-NWFKNRRQRDR-----  
P09088::Caenorhabditis\_elegans -----RGPRTTIKQNQLDVLNEMFSNT--PKP-----SKHA-----RAKLALAE-----TGLSMRVIQ-VWFQNRRSKERR-----  
P34764::Caenorhabditis\_briggsae\_AF16 -----RGPRTTIRQNQLDVLNEMFSNT--PKP-----SKHA-----RAKLALAE-----TGLSMRVIQ-VWFQNRRSKERR-----  
AME08554\_1::Apis -----FSEEQKEALRLAFAL--DPYP-----NVAT-----IEFLAGE-----LAL-SSRTITNWFHHRMRLK-----  
O73708::Danio\_rerio -----FKERTSLLREWYLD--PYP-----NPSK-----KRELAQA-----TGLTPTQVG-NWFKNRRQRDR-----  
O73709::Danio\_rerio -----FKERTRGLLREWYLD--PYP-----NPSK-----KRELAQA-----TGLTPTQVG-NWFKNRRQRDR-----  
O73916::Oryzias\_latipes -----FKERTRGLLREWYLD--PYP-----NPGK-----KRELAHA-----TGLTPTQVG-NWFKNRRQRDR-----  
O93282::Danio\_rerio -----FKERTSLLREWYLD--PYP-----NPSR-----KRHLAQA-----TGLTPTQVG-NWFKNRRQRDR-----  
O95475::HUMAN -----FKERTRNLLREWYLD--PYP-----NPSK-----KRELAQA-----TGLTPTQVG-NWFKNRRQRDR-----  
PTE05656\_1::Poncirus -----TPLQAKALKFYSEE--KYP-----TKRE-----MEGLAAA-----LDLTYKQVR-TWIEKRRRDK-----  
Q23175::Caenorhabditis\_elegans -----FKERTSLLREWYLD--PYP-----NPPK-----KKELANA-----TGLTQMVG-NWFKNRRQRDR-----  
Q5TYZ2::Danio\_rerio -----FKERTRHLLREWYLD--PYP-----NPSK-----KRELAQA-----TGLTPTQVG-NWFKNRRQRDR-----  
Q94166::Caenorhabditis\_elegans -----FRDKSRVLLRDWYCRN--SYP-----SPRE-----KRELAEK-----THLVTQVS-NWFKNRRQRDR-----  
AME10017\_1::Apis -----FKHHQLRTMKSIFYAIN--HNP-----DAKD-----LKQLSQK-----TGLPKRVLQ-VWFQNAKAWRR-----  
HGP07414\_1|Caenorhabditis\_briggsae\_AF16 -----LNENQLRILKQTYQGN--QRP-----DTNT-----KEQLVKM-----TGLNARVIR-VWFQNKCKDKK-----  
Q9UIU6::HUMAN -----FKEKSRNALKELYKQN--RYP-----SPAЕ-----KRHLAKI-----TGLSLTQVS-NWFKNRRQRDRN-----  
P34765::CAEVU -----RGPRTTIKQNQLDVLNEMFSNT--PKP-----SKHA-----RAKKALE-----TGLSMRVIQ-VWFQNRRSKERR-----  
luhsA::MOUSE -----AATMTEDQVEILEYFNKVN--KHP-----DPTT-----LCLIAAE-----AGLTEEQTQ-KWFKQRLAEWRR-----  
P10180::Drosophila\_melanogaster -----KKQRVLFSEEQKEALRLAFAL--DPYP-----NVGT-----IEFLANE-----LGL-ATRTITNWFHHRMRLK-----  
lakhA|Saccharomyces\_cerevisiae -----ISPQARAFLEEVFRRK--QSL-----NSKE-----KEEVAKK-----CGITPLQVR-VWFINKMRS-----  
CCE07653\_1::Cyprinus -----LEGTVRSALSYFVK--CPKP-----NTLE-----ITHISDD-----LGL-ERDVVRVWFENRRQKGR-----  
ECD00006\_1::Equus -----IENRVRGLENMFLQ--CPKP-----TLQQ-----ISHIAQQ-----LGL-EKDVRVWFENRRQKGR-----  
GAP00667\_1::Oryzias\_latipes -----LEGAVRSALSYFIK--CPKP-----NTQE-----ITHISDD-----LGL-ERDVVRVWFENRRQKGR-----  
GRD08656\_1::Gossypium -----PTPLQLQILENIYEQG--TGT-----PSKQKIKEIASELAQH-----GQISETNVY-NWFQNRARSKR-----  
HAD01349\_1::Helianthus -----PTPVQLQILERLFEQG--NGT-----PSKQKIKEITSELSQH-----GQISETNVY-NWFQNRARSKR-----  
GAP02710\_1|Tetraodon\_nigroviridis -----KTKEQLDLVKQHFRLC--QWP-----KSED-----YTELVKL-----TNLPRADVI-QWFGDTRYAVKN-----  
HSP00500\_1::Caenorhabditis\_briggsae\_AF16 -----LNENQLRILKQTYQGN--QRP-----DTNT-----KEQLVEM-----TGLNARVIR-VWFQNKCKDKK-----  
O88706::MOUSE -----KRARTSF TAEQLQVMAQFAQD--NNP-----DAQT-----LQKLADM-----TGLSRVVIQ-VWFQNCRARHKK-----  
P50458::HUMAN -----KRMRTSFKHHQLRTMKSIFYAIN--HNP-----DAKD-----LKQLAQK-----TGLTKRVLQ-VWFQNAKAFRR-----  
PPD17649\_1::Pongo -----SHEQLSALKGSFCRN--QFP-----GQSE-----VEHLTKV-----TGLSTREVR-KWFSDRRYHCRR-----  
PYD04598\_1::Porphyra -----TESQRRLLSATFAQN--PYP-----DVTT-----KNLLAEQ-----LGVNRPVVS-KWFQHRQRARR-----  
ECD02963\_1::Equus -----TEDQVEILEYFNKVN--KHP-----DPTT-----LCLIAAE-----AGLSEETQ-KWFKQRLAQWRR-----  
IPD13553\_1::Ictalurus -----IRVSVKGALESHFLK--CPKT-----SAQE-----ISTLADT-----LQLGEGRVVRVWVWENRRQKE-----  
PTJ02837\_1::Pantroglodytes -----TEDQVEILEYFNKVD--KHP-----DSTT-----LCLIAAE-----AGLSEETQ-KWFKQRLAKWRR-----  
P13528::Caenorhabditis\_elegans -----RKKRTSIAAPEKRELEQFFKQ--QPRP-----SGER-----IASIADR-----LDL-KKNVVRVWFENRRQKQKR-----  
P16241::Drosophila\_melanogaster -----RKKRTSIEVSVKGALEQHFHK--QPKP-----SAQE-----ITSLADS-----LQL-EKEVVRVWFENRRQKEKR-----  
P20263::MOUSE -----RKKRTSIENRVRWSLETMFLK--CPKP-----SLQQ-----ITHIANQ-----LGL-EKDVRVWFENRRQKGR-----  
P20264::HUMAN -----RKKRTSIEVSVKGALESHFLK--CPKP-----SAQE-----ITNLADS-----LQL-EKEVVRVWFENRRQKEKR-----  
P20265::HUMAN -----RKKRTSIEVSVKGALESHFLK--CPKP-----SAQE-----ITSLADS-----LQL-EKEVVRVWFENRRQKEKR-----  
P20267::Rattus -----RKKRTSIEVGVKGALESHFLK--CPKP-----SAHE-----ITGLADS-----LQL-EKEVVRVWFENRRQKEKR-----  
P31362::MOUSE -----RKKRTSIETNIRLTLEKRFQD--NPKP-----SSEE-----ISMIAEQ-----LSM-EKEVVRVWFENRRQKEKR-----  
P31363::XENLA -----RKKRTSIEVGVKGALENHFLK--CPKP-----SAHE-----ITSLADS-----LQL-EKEVVRVWFENRRQKEKR-----  
CSE07550\_1::Citrus -----PTPVQLQILESIFDQG--TGT-----PSKQKIKEITVELSQH-----GQISETNVY-NWFQNRARSKR-----  
GRD14308\_1::Gossypium -----PTPVQLQILERIFDQG--TGT-----PSKQKIKEITSELSQH-----GQISETNVY-NWFQNRARSKR-----  
P50480::Rattus -----RVRTVLNEKQLHLTRLTCYAA--PRP-----DALM-----KEQLVEM-----TGLSPRVIR-VWFQNKCKDKK-----



P53407::Danio\_rerio -----RVRTLNEKQLHLRLTCYNAN--PRP-----DALM-----KEQLVEM-----TGLSPRVIR-VWFQNKRCCKDKK-----  
ACF08129\_1::Allium -----YTPDXNQVLEEFYCRN--PHP-----DAND-----RKQLGKALG-----FTDDRIRK-YWFQNRRAVDRR-----  
MIP03533\_1|Brugia\_malayi -----LDTAQKLSLDTFRFRI--DPRP-----DNAR-----MVEIATL-----LDL-DHDVVRVWFQNRQKLRK-----  
PPD00896\_1::Pongo -----FPKVATNIMRAWLFWHLTHPYP-----SEEQ-----KKQLAQD-----TGLTILQVN-NWFINARRR-----  
SPE20651\_1::Strongylocentrotus -----FLKSATNIMRAWLFWHLTHPYP-----SEEQ-----KKQLAQD-----TGLTILQVN-NWFINARRR-----  
SSF51768\_1::Salmo -----IDTNIRVALEKSFLQ--NQKP-----SSDE-----ISLIADQ-----LNM-EKEVIRVWFQNRQKEKR-----  
Q8SIX5::HUMAN -----FKERSRAALKACYRGN--RYP-----TPDE-----KRRLATL-----TGLSLTQVS-NWFKNRQRDR-----  
SPE28381\_1::Strongylocentrotus -----FKERTSLLREWYLD--PYP-----NPTK-----KRELAQA-----TGLTPTQVG-NWFKN-----  
O35652::MOUSE -----KRARTSFTADQLQVMQAQFAQD--NNP-----DAQT-----LQKLAER-----TGLSRRVIQ-VWFQNCRAHKK-----  
P29673::Drosophila\_melanogaster -----KRMRTSFKHHQLRMTKSYFAIN--HNP-----DAKD-----LKQLSQK-----TGLPKRVLQ-VWFQNAKAWRR-----  
CND11255\_1::Filobasidiellaneoformans -----FTKRELEALEVLWSIA--KSP-----SKYE-----RQLRG--AWL--G-VKTKHIT-VWFQKRQEEKR-----  
PPG46627\_1::Physcomitrella -----ASQTEVLERAYAVE--KYP-----SEAT-----RQKLVDR-----LDLSDKQLQ-IWFTHRRYKDRR-----  
1au7A::Rattus\_norvegicus -----KRRRTTISIAAKDALERHFGE--HMKP-----SSQE-----IMRMAEE-----LNL-EKEVVRVWFQNRQREKR-----  
1bw5::Rattus\_norvegicus -----TTRVRTVLEKQLHLRLTCYAN--PRP-----DALM-----KEQLVEM-----TGLSPRVIR-VWFQNKRCCKDKK-----  
DJP03285\_1::Girardia\_tigrina -----IEANVKSILESSFMK--LSKP-----SAQD-----ISSLAEK-----LSL-EKEVVRVWFQNRQ-----  
HPP00771\_1::Strongylocentrotus\_purpuratus -----FTDLQRRTLHAIFKE--NKRK-----SKEM-----QITIAQQ-----LGL-ELSTVSNFFMNARRR-----  
1cqtB::HUMAN -----RKKRTSIEETNIRVALEKSFLQ--NQKP-----TSEE-----ITMIADQ-----LNM-EKEVIRVWFQNRQKEKR-----  
O97552::BOVIN -----KRRRTSIEENRVRGNLESFMLQ--CPKP-----TLQQ-----ISHIAQQ-----LGL-EKDVRVWFQNRQKQKR-----  
P10036::BOVIN -----KRRRTTISIAAKDALERHFGE--QNKP-----SSQE-----ILRMAEE-----LNL-EKEVVRVWFQNRQREKR-----  
P10037::Rattus -----KRRRTTISIAAKDALERHFGE--HMKP-----SSQE-----IMRMAEE-----LNL-EKEVVRVWFQNRQREKR-----  
P14859::HUMAN -----RKKRTSIEETNIRVALEKSFLQ--NQKP-----TSEE-----ITMIADQ-----LNM-EKEVIRVWFQNRQKEKR-----  
P25425::MOUSE -----RKKRTSIEETNIRVALEKSFME--NQKP-----TSED-----ITLIAEQ-----LNM-EKEVIRVWFQNRQKEKR-----  
P28069::HUMAN -----KRRRTTISIAAKDALERHFGE--QNKP-----SSQE-----IMRMAEE-----LNL-EKEVVRVWFQNRQREKR-----  
P31364::XENLA -----RKKRTSIEVSVKGVLETHFLK--CPKP-----AALE-----ITSLADS-----LQL-EKEVVRVWFQNRQKEKR-----  
ENP07708\_1::Aspergillus\_nidulans\_FGSC\_A4 -----YSPEDYAILAEYQRN--PKP-----DKIS-----RASIVSRVS-----LGEKEVQ-IWFQNRQNDRR-----  
P24350::Drosophila\_melanogaster -----KKRTSIAAPEKRSLEAYFAV--QPRP-----SGEK-----IAAIAEK-----LDL-KKNVVRVWFQNRQKQKR-----  
AME03197\_1::Apis -----LTTDQEAVLQEQFNRP--RAP-----HTAD-----IVLLAAE-----TGLSEADVE-AWYSIRLAQWRK-----  
P09086::HUMAN -----RKKRTSIEETNIRVALEKSFLQ--NQKP-----TSEE-----ILLIAEQ-----LHM-EKEVIRVWFQNRQKEKR-----  
P17208::MOUSE -----KRRRTSIAAPEKRSLEAYFAV--QPRP-----SSEK-----IAAIAEK-----LDL-KKNVVRVWFQNRQKQKR-----  
P20268::Caenorhabditis\_elegans -----RKKRTSIEVNVKSLRLEPHFQS--NQKP-----NAQE-----ITQVAME-----LQL-EKEVVRVWFQNRQKEKR-----  
P39881::CANFA -----KKPRVVLAPPEEKEALKRAYQQ--KPYK-----SPKT-----IEELATQ-----LNL-KTSTVINWFHNYRSRIRR-----  
21fb|Rattus\_rattus -----RRNRFKWPASQQLFQAYERQ--KNP-----SKEE-----RETLVEE-----CNVTEVRVY-NWFANRRKEE-----  
Q5TV95::Anopheles\_gambiae\_str.\_PEST PRTIWDGEQKTHCFKERTSLLREWYLD--PYP-----NPTK-----KRELAQA-----TGLTPTQVG-NWFKNRQRDR-----  
CPG05237\_1::Coccidioides -----LPKPTTDILRAWFYEHLDHPYP-----SEQD-----KQMFMT-----TGLTISQIS-NWFINARRRH-----  
TVE05086\_1::Trichomonas -----FSDSQRSILMHWLKNHQSHPYP-----TSSE-----KQELIEK-----TGLNRDQIN-VWFTNNVRH-----  
CCD00425\_1::Conidiobolus -----GNSWQINRLFEEFFERC--PRP-----TRAQ-----VHSLSVE-----LEMPKISIR-IWFQNRHSKQ-----  
Q94165::Caenorhabditis\_elegans -----FKSKSRNVLRLDAYKKC--QYP-----SVED-----KRRLAQQ-----TELSIQVS-NWFKNKQRER-----  
Q9NJB5::Drosophila\_melanogaster -----KKPRLVFTDLQRRTLQAIFKE--TKRP-----SKEM-----QVTIARQ-----LGL-EPTTVGNFFMNARRR-----  
Q22811::Caenorhabditis\_elegans -----RLTFTETQLKSLQKSFQQ--NHRP-----TREM-----RQKLSAT-----LEL-DFSTVGNFFMNSRRLR-----  
P39880::HUMAN -----KKPRVVLAPPEEKEALKRAYQQ--KPYK-----SPKT-----IEDLATQ-----LNL-KTSTVINWFHNYRSRIRR-----  
AYP01413\_1|Caenorhabditis\_briggsae\_AF16 -----FTDIQRRTLQAIFKE--TKRP-----SREM-----QLTISQQ-----LGL-DPTTVANFFMNARRR-----  
HCP08366\_1|Caenorhabditis\_elegans -----FTDIQKRTLQAIFKE--TQRP-----SREM-----QQTIAEH-----LRL-DLSTVANFFMNARRSR-----  
SSP00594\_1|Brugia\_malayi -----FSDVQKRTLQAIFKE--TERP-----SKEM-----QQTIAEH-----LGL-DPSTVSNYFNMARRSR-----  
1wjhA::Drosophila\_melanogaster -----RKTKEQLAILKSFLLQC--QWA-----RRED-----YQKLEQI-----TGLPRPEII-QWFGDTRYALKHGQLKW-----  
1s7eA::MOUSE -----KKPRLVFTDVQRRTLHAIFKE--NKRK-----SKEL-----QITISQQ-----LGL-ELSTVSNFFMNAR-----  
O60422|HUMAN -----KKQRLVFTDLQRRTLHAIFKE--NKRK-----SKEM-----QVTISQQ-----LGL-ELNLTVSNFFMNARRC-----

O95948::HUMAN -----KKSRLVFTDLQRRTLFAIFKE--NKRPSKEM-----QITISQQ-----LGL-ELTTVSNFFMNARRR-----  
 P70512::Rattus -----KKPRLVFTDVQRRTLHAIFKE--NKRPSKEL-----QITISQQ-----LGL-ELSTVSNFFMNARRR-----  
 Q5MD20::Danio\_erio -----KKPRLVFTDVQRRTLHAIFKE--NKRPSKEL-----QITISQQ-----LGL-ELATVSNFFMNGRRR-----  
 O14529::HUMAN -----KKPRVVLAPEEKEALRKAYQL--EPYPSQQT-----IELLSFQ-----LNL-KTNTVINWFHNYRSRMRR-----  
 P20266::Rattus -----KKRRTSIAAPEKRSLEAYFAV--QPRPSSEK-----IAATAEK-----LDL-KKNVVRVWFCN-----  
 Q19720::Caenorhabditis\_elegans -----KRPRLVFTDIQKRTLQAIFKE--TQRPSREM-----QQTIAEH-----LRL-DLSTVANFFMNARRRSR-----  
 lwi3A::HUMAN -----RTKISLEALGILQSFIDVG--LYPDQEA-----IHTLSAQ-----LDLPKHTII-KFFQNRQYHVK-----  
 P70298::MOUSE -----KKPRVVLAPAEKEALRKAYQL--EPYPSQQT-----IELLSFQ-----LNL-KTNTVINWFHNYRSRMRR-----  
 Q22812::Caenorhabditis\_elegans -----RIRRFFTQTQLDSLHTVVFQ--QDRPSNREM-----QQALSAT-----LKL-NRSTVGNFFMNARRRLPK-----  
 Q61JC4::Caenorhabditis\_briggsae\_AF16 -----RTVITDYQKDVLRVVFVN--ELHPTNEM-----IEQIATK-----LEM-SLRTVQNWFFHNHRTRSK-----  
 AMF20019\_1::Ambystoma -----ISVEALGILQSFIDVG--LYPDEEA-----IHTLSAQ-----LDLPKYTII-KFFQNRQY-----  
 Q01826::HUMAN -----RPRTKISVEALGILQSFIDVG--LYPDEEA-----IQTLAQ-----LDLPKYTII-KFFQNRQYLLK-----  
 O45080::Caenorhabditis\_elegans -----KKTRLVFSDIQRRTLQAIFRE--TKRPSREM-----QITISQQ-----LNL-DPTTVANFFMNARRR-----  
 O16218::Caenorhabditis\_elegans -----RARCLLSQDQKSQLSIFFET--NPRPSDSE-----MKQLGST-----LNL-CKSTIINYFTNMRRR-----  
 HJP06140\_1::Gibberella\_zeae\_PH1 -----FAPHVEKRLEEYYQKQ--PFPNDSE-----SAFLASNLG-----IEPFHLG-LWFHRRER-----  
 HGP08389\_1|Brugia\_malayi -----FRPVLLRVLETYFQKC--PFPDIAKRVEIANACN-----AHLQVDKRGVQLMPKEVVTPQVIA-NWFANKRREMRR-----

VNE blosum62

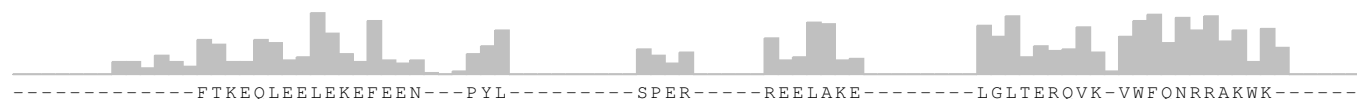

Supplement: supp_gkq714_Santos-Turinsky-Supplementary-FigureS1-NAR-Apr-2010.pdf [file supp_gkq714_Santos-Turinsky-Supplementary-FigureS1-NAR-Apr-2010.pdf]
